# Supplementary material for: COREMIC: a web-tool to search for a niche associated CORE MICrobiome
Source: PubMed Central journal article supplement (PMC5816963; doi:10.7717/peerj.4395), 2018-02-15
Supplement: peerj-06-4395-s002.pdf [file peerj-06-4395-s002.pdf]

# Abundance of Core Microbes

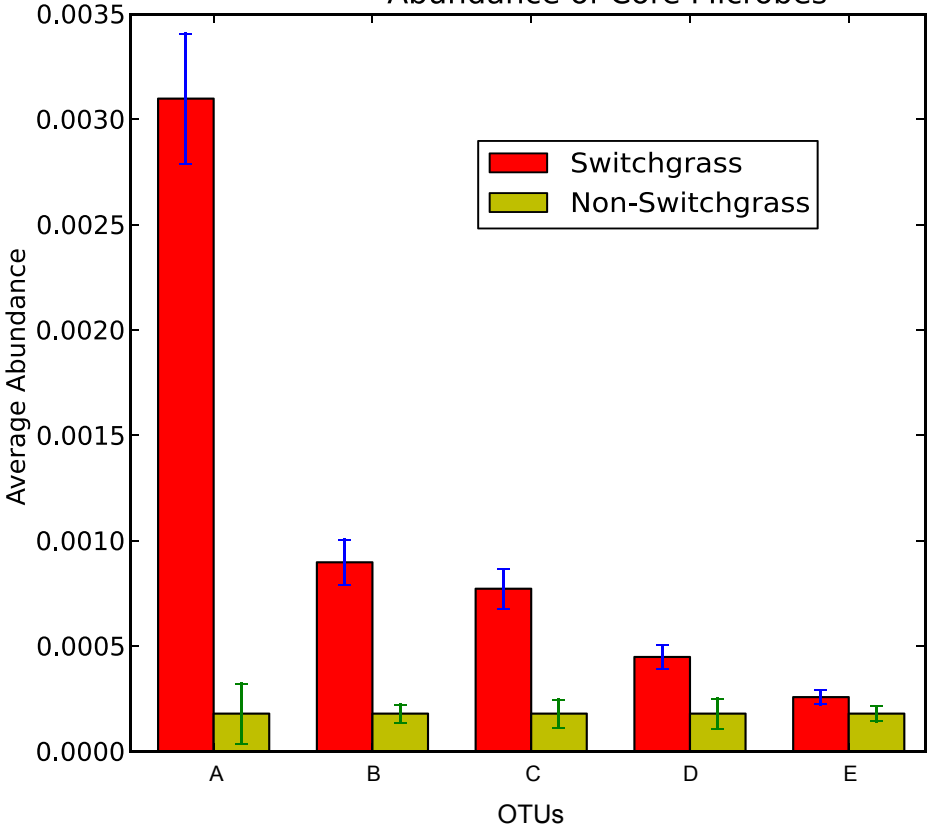

A: OTU 629 p\_Proteobacteria;c\_Gammaproteobacteria;o\_Xanthomonadales;f\_Xanthomonadaceae;g\_Lysobacter;s\_
   
 B: OTU 470 p\_Proteobacteria;c\_Alphaproteobacteria;o\_Rhizobiales;f\_Phyllobacteriaceae;g\_Mesorhizobium;s\_
   
 C: OTU 606 p\_Proteobacteria;c\_Gammaproteobacteria;o\_Legionellales;f\_g;s\_
   
 D: OTU 199 p\_Bacteroidetes;c\_[Saprospirae];o\_[Saprospirales];f\_Chitinophagaceae
   
 E: OTU 417 p\_Planctomycetes;c\_Planctomycetia;o\_B97;f\_g;s\_
