# Supplementary material for: COREMIC: a web-tool to search for a niche associated CORE MICrobiome
Source: PubMed Central journal article supplement (PMC5816963; doi:10.7717/peerj.4395), 2018-02-15

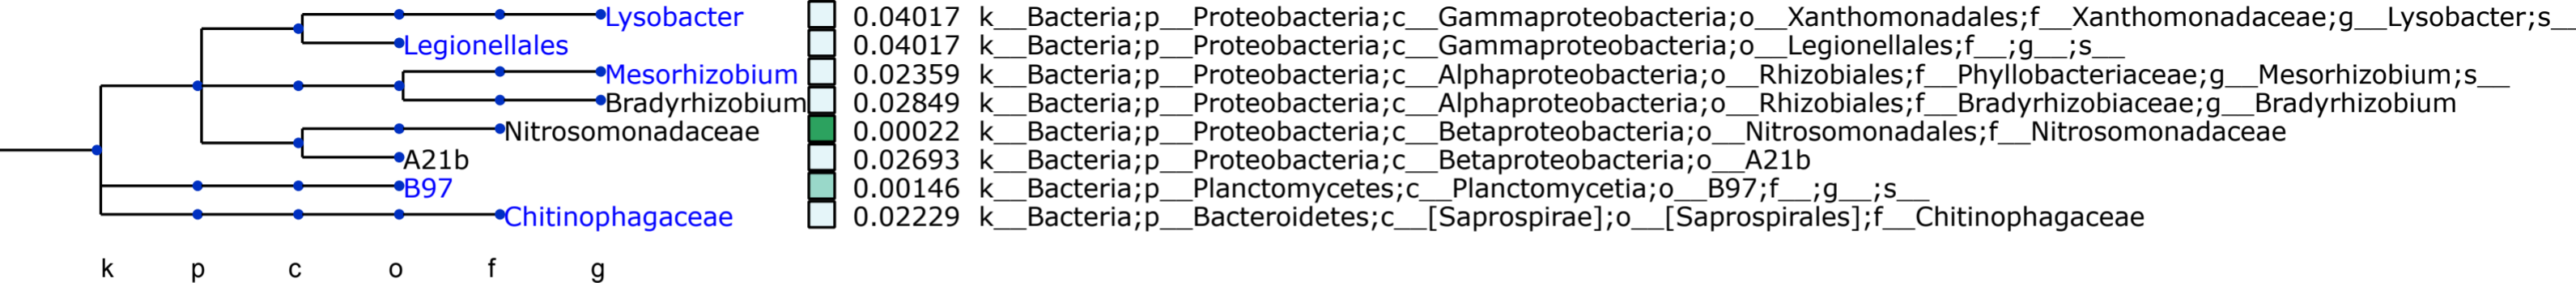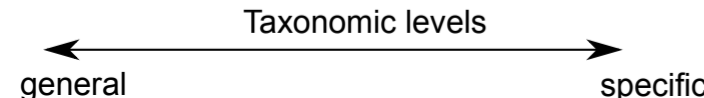

Supplement: peerj-06-4395-s003.pdf [file peerj-06-4395-s003.pdf]
