# Supplementary material for: COREMIC: a web-tool to search for a niche associated CORE MICrobiome
Source: PeerJ. 2018 Feb 15;6:e4395. doi: 10.7717/peerj.4395 (PMC5816963; doi:10.7717/peerj.4395)
Supplement: Table S3 — (A) OTUs are ranked as per significance of differential abundance (Mann Whitney U test, FDR <0.05) in switchgrass and other grasses. Anosim, Adonis, MRPP (pvalue <0.01) showed bacterial community differences due to (B) plants and (C) datatsets. [file peerj-06-4395-s006.xlsx]

## Sheet: (a) mann_whitney_u_FDR 5%
taxonomy	Sw_mean	Gr_mean	FDR_P
k__Bacteria;p__Proteobacteria;c__Alphaproteobacteria;o__Sphingomonadales;f__Sphingomonadaceae;g__Sphingobium;s__	3.77419	0	4.49e-05
k__Bacteria;p__Proteobacteria;c__Alphaproteobacteria;o__Sphingomonadales;f__Sphingomonadaceae;g__;s__	6.22581	1.25	0.00127663
k__Bacteria;p__Verrucomicrobia;c__[Spartobacteria];o__[Chthoniobacterales];f__[Chthoniobacteraceae];g__;s__	3.25806	0.0714286	0.00178493
k__Bacteria;p__Bacteroidetes;c__[Saprospirae];o__[Saprospirales];f__Chitinophagaceae;g__Flavisolibacter;s__	4.58065	0.178571	0.00309721
k__Bacteria;p__TM7;c__TM7-1;o__;f__;g__;s__	1.45161	0.142857	0.00309721
k__Bacteria;p__Actinobacteria;c__Thermoleophilia;o__Solirubrobacterales	1.58065	3.96429	0.00309721
k__Bacteria;p__Verrucomicrobia;c__Verrucomicrobiae;o__Verrucomicrobiales;f__Verrucomicrobiaceae;g__Luteolibacter;s__	3.22581	0.0357143	0.00309721
k__Bacteria;p__Cyanobacteria;c__Nostocophycideae;o__Nostocales;f__Nostocaceae;g__;s__	1.48387	0.0357143	0.00309721
k__Bacteria;p__Actinobacteria;c__Actinobacteria;o__Actinomycetales;f__Geodermatophilaceae;g__;s__	1.77419	4.42857	0.00309721
k__Bacteria;p__Actinobacteria;c__Actinobacteria;o__Actinomycetales;f__Pseudonocardiaceae;g__Pseudonocardia;s__	6.83871	14.6786	0.00309721
k__Bacteria;p__Actinobacteria;c__Actinobacteria;o__Actinomycetales;f__Micromonosporaceae	2.51613	5.25	0.00397177
k__Bacteria;p__Proteobacteria;c__Alphaproteobacteria;o__Sphingomonadales;f__Sphingomonadaceae;g__Sphingomonas;s__	3.90323	0.821429	0.00397177
k__Bacteria;p__Verrucomicrobia;c__[Spartobacteria];o__[Chthoniobacterales];f__[Chthoniobacteraceae];g__DA101;s__	16.5806	0.607143	0.00397177
k__Bacteria;p__Proteobacteria;c__Deltaproteobacteria;o__Myxococcales;f__Polyangiaceae;g__Sorangium;s__	0.0967742	0.75	0.00397177
k__Bacteria;p__Actinobacteria;c__Actinobacteria;o__Actinomycetales;f__Geodermatophilaceae;g__Geodermatophilus;s__	0.451613	1.82143	0.00397177
k__Bacteria;p__Proteobacteria;c__Deltaproteobacteria;o__Myxococcales;f__Haliangiaceae;g__;s__	4.54839	8.71429	0.00397177
k__Bacteria;p__Proteobacteria;c__Betaproteobacteria;o__MND1;f__;g__;s__	6.74194	13.2143	0.00397177
k__Bacteria;p__Proteobacteria;c__Alphaproteobacteria;o__Rhizobiales;f__Bradyrhizobiaceae;g__Bradyrhizobium;s__	1.45161	3.85714	0.00397177
k__Bacteria;p__Proteobacteria;c__Deltaproteobacteria;o__Bdellovibrionales;f__Bdellovibrionaceae;g__Bdellovibrio;s__	0.83871	0	0.00397177
k__Bacteria;p__Verrucomicrobia;c__[Spartobacteria];o__[Chthoniobacterales];f__[Chthoniobacteraceae];g__CandidatusXiphinematobacter;s__	0.806452	0	0.00397177
k__Bacteria;p__Verrucomicrobia;c__Verrucomicrobiae;o__Verrucomicrobiales;f__Verrucomicrobiaceae;g__;s__	0.935484	0	0.00397177
k__Bacteria;p__Actinobacteria;c__Thermoleophilia;o__Solirubrobacterales;f__Solirubrobacteraceae	0.387097	1.46429	0.00397177
k__Bacteria;p__Actinobacteria;c__Actinobacteria;o__Actinomycetales;f__Micrococcaceae;g__Arthrobacter;s__	3.74194	0.107143	0.00422168
k__Bacteria;p__Armatimonadetes;c__0319-6E2;o__;f__;g__;s__	1.22581	2.60714	0.00422168
k__Bacteria;p__Actinobacteria;c__Actinobacteria;o__Actinomycetales;f__Micromonosporaceae;g__;s__	2.41935	5.5	0.00433886
k__Bacteria;p__Actinobacteria;c__Actinobacteria;o__Actinomycetales;f__;g__;s__	7.12903	13.3929	0.00457331
k__Bacteria;p__Proteobacteria;c__Alphaproteobacteria;o__Rhizobiales;f__Bradyrhizobiaceae;g__;s__	3.58065	1	0.00457331
k__Bacteria;p__TM6;c__SJA-4;o__;f__;g__;s__	1	0.107143	0.00469966
k__Bacteria;p__Proteobacteria;c__Deltaproteobacteria;o__Myxococcales;f__;g__;s__	16.4516	25.5714	0.00471151
k__Bacteria;p__Actinobacteria;c__Actinobacteria;o__Actinomycetales;f__Micrococcaceae	0.903226	1.85714	0.0050025
k__Bacteria;p__Actinobacteria;c__Actinobacteria;o__Actinomycetales;f__Kineosporiaceae	0.935484	2.60714	0.00545781
k__Bacteria;p__Acidobacteria;c__Acidobacteria-6;o__iii1-15;f__;g__;s__	79.2581	55.5	0.00545781
k__Bacteria;p__Gemmatimonadetes;c__Gemmatimonadetes;o__Gemmatimonadales;f__;g__;s__	0.354839	1.39286	0.00545781
k__Bacteria;p__Proteobacteria;c__Betaproteobacteria;o__Nitrosomonadales;f__Nitrosomonadaceae	0.548387	1.89286	0.0058584
k__Bacteria;p__Actinobacteria;c__Thermoleophilia;o__Solirubrobacterales;f__Conexibacteraceae;g__;s__	1.96774	4.28571	0.0058584
k__Bacteria;p__Planctomycetes;c__Planctomycetia;o__Gemmatales;f__Isosphaeraceae;g__;s__	2.29032	5.17857	0.00586767
k__Bacteria;p__Proteobacteria;c__Alphaproteobacteria;o__Sphingomonadales;f__Sphingomonadaceae;g__Novosphingobium;s__	2.45161	0.392857	0.00842312
k__Bacteria;p__Gemmatimonadetes;c__Gemm-5;o__;f__;g__;s__	0.483871	2	0.00854877
k__Bacteria;p__Proteobacteria;c__Alphaproteobacteria;o__Rhodobacterales;f__Hyphomonadaceae;g__;s__	0.903226	0.0357143	0.00885572
k__Bacteria;p__Proteobacteria;c__Alphaproteobacteria;o__Rhizobiales;f__Bradyrhizobiaceae;g__Bradyrhizobium	2.22581	4.53571	0.00888358
k__Bacteria;p__Verrucomicrobia;c__[Pedosphaerae];o__[Pedosphaerales];f__auto67_4W;g__;s__	0.935484	0	0.00888358
k__Bacteria;p__Actinobacteria;c__Actinobacteria;o__Actinomycetales;f__Frankiaceae;g__;s__	1.03226	3	0.00903416
k__Bacteria;p__Proteobacteria;c__Alphaproteobacteria;o__Sphingomonadales;f__Sphingomonadaceae;g__Kaistobacter;s__	30.7097	0.964286	0.00903416
k__Bacteria;p__Fibrobacteres;c__Fibrobacteria;o__258ds10;f__;g__;s__	0.354839	1.32143	0.00937686
k__Bacteria;p__Bacteroidetes;c__[Saprospirae];o__[Saprospirales];f__Chitinophagaceae;g__;s__	42.9677	19.9643	0.00954206
k__Bacteria;p__Proteobacteria;c__Alphaproteobacteria;o__Rhodospirillales;f__Acetobacteraceae;g__;s__	2.41935	4.71429	0.00954206
k__Bacteria;p__Verrucomicrobia;c__[Spartobacteria];o__[Chthoniobacterales];f__[Chthoniobacteraceae];g__Chthoniobacter;s__	1.09677	0.0714286	0.00977503
k__Bacteria;p__Proteobacteria;c__Alphaproteobacteria;o__Sphingomonadales;f__Sphingomonadaceae	2.64516	0.785714	0.0101913
k__Bacteria;p__Proteobacteria;c__Gammaproteobacteria;o__Xanthomonadales;f__Xanthomonadaceae	0.322581	1.35714	0.0101913
k__Bacteria;p__Actinobacteria;c__Actinobacteria;o__Actinomycetales;f__Intrasporangiaceae	2.22581	0.285714	0.0108032
k__Bacteria;p__Proteobacteria;c__Alphaproteobacteria;o__Sphingomonadales;f__Sphingomonadaceae;g__Sphingomonas;s__wittichii	1.25806	0.142857	0.0110698
k__Bacteria;p__Proteobacteria;c__Gammaproteobacteria;o__Xanthomonadales;f__Xanthomonadaceae;g__Lysobacter;s__	2.90323	0.857143	0.0129071
k__Bacteria;p__Proteobacteria;c__Gammaproteobacteria;o__Legionellales;f__Coxiellaceae;g__Rickettsiella;s__	0.387097	0	0.0132719
k__Bacteria;p__Proteobacteria;c__Deltaproteobacteria;o__Myxococcales;f__Myxococcaceae;g__Myxococcus;s__	0.129032	0.75	0.01385
k__Bacteria;p__Chloroflexi;c__TK10;o__B07_WMSP1;f__;g__;s__	1.41935	2.92857	0.0138787
k__Bacteria;p__Gemmatimonadetes;c__Gemm-3;o__;f__;g__;s__	1.03226	3.10714	0.0149494
k__Bacteria;p__Planctomycetes;c__Planctomycetia;o__Pirellulales;f__Pirellulaceae;g__;s__	5.87097	9.17857	0.0167992
k__Bacteria;p__Acidobacteria;c__iii1-8;o__32-20;f__;g__;s__	4.12903	6.25	0.0167992
k__Bacteria;p__Proteobacteria;c__Betaproteobacteria;o__Burkholderiales;f__Comamonadaceae;g__Methylibium;s__	4.22581	7.21429	0.017144
k__Bacteria;p__Chlamydiae;c__Chlamydiia;o__Chlamydiales;f__;g__;s__	0.677419	0.0714286	0.0175721
k__Bacteria;p__Verrucomicrobia;c__[Pedosphaerae];o__[Pedosphaerales];f__Ellin515;g__;s__	3.19355	0.285714	0.0177809
k__Bacteria;p__Proteobacteria;c__Alphaproteobacteria;o__Rhodobacterales;f__Rhodobacteraceae;g__Amaricoccus;s__	1.25806	3.25	0.0182375
k__Bacteria;p__Actinobacteria;c__Actinobacteria;o__Actinomycetales	0.935484	2.10714	0.0195805
k__Bacteria;p__Planctomycetes;c__Pla4;o__;f__;g__;s__	0.645161	1.42857	0.0196458
k__Bacteria;p__Armatimonadetes;c__Chthonomonadetes;o__Chthonomonadales;f__Chthonomonadaceae	0.774194	0.0357143	0.020252
k__Bacteria;p__Firmicutes;c__Bacilli;o__Bacillales;f__Bacillaceae	0.645161	1.89286	0.0204588
k__Bacteria;p__Verrucomicrobia;c__[Spartobacteria];o__[Chthoniobacterales];f__[Chthoniobacteraceae];g__OR-59;s__	0.451613	0	0.0204588
k__Bacteria;p__Actinobacteria;c__Actinobacteria;o__Actinomycetales;f__Micrococcaceae;g__Arthrobacter	0.612903	0	0.0204588
k__Bacteria;p__Actinobacteria;c__Actinobacteria;o__Actinomycetales;f__Intrasporangiaceae;g__Phycicoccus;s__	0.903226	0.0357143	0.0204588
k__Bacteria;p__Actinobacteria;c__Actinobacteria;o__Actinomycetales;f__Propionibacteriaceae;g__;s__	2.12903	3.42857	0.0241963
k__Bacteria;p__Verrucomicrobia;c__[Pedosphaerae];o__[Pedosphaerales];f__;g__;s__	3.29032	0.678571	0.0241963
k__Bacteria;p__Actinobacteria;c__Actinobacteria;o__Actinomycetales;f__Nocardioidaceae;g__;s__	10.4516	17.7857	0.0242545
k__Bacteria;p__Proteobacteria;c__Betaproteobacteria;o__Burkholderiales;f__Comamonadaceae	3.74194	5.75	0.0249087
k__Bacteria;p__Actinobacteria;c__Thermoleophilia;o__Gaiellales;f__;g__;s__	3.64516	5.39286	0.0251134
k__Bacteria;p__Proteobacteria;c__Alphaproteobacteria;o__Rhizobiales;f__Bradyrhizobiaceae	0.709677	1.75	0.0280121
k__Bacteria;p__Planctomycetes;c__Phycisphaerae;o__WD2101;f__;g__;s__	28.3548	16.0714	0.0299796
k__Bacteria;p__Firmicutes;c__Clostridia;o__Clostridiales;f__Clostridiaceae;g__Clostridium;s__	1.03226	0.392857	0.0373
k__Bacteria;p__Actinobacteria;c__Actinobacteria;o__Actinomycetales;f__Nocardioidaceae	0.193548	0.535714	0.0402586
k__Bacteria;p__Bacteroidetes;c__Cytophagia;o__Cytophagales;f__Cytophagaceae;g__Adhaeribacter;s__	1.80645	3.32143	0.0422348
k__Bacteria;p__Proteobacteria;c__Alphaproteobacteria;o__Rhizobiales;f__Phyllobacteriaceae;g__Mesorhizobium;s__	1	0.357143	0.0426566
k__Bacteria;p__Chloroflexi;c__Anaerolineae;o__envOPS12;f__;g__;s__	4.32258	7.46429	0.0426566
k__Bacteria;p__Proteobacteria;c__Alphaproteobacteria;o__Rhizobiales;f__Hyphomicrobiaceae;g__Hyphomicrobium;s__sulfonivorans	0.0645161	0.357143	0.0439818
k__Bacteria;p__Proteobacteria;c__Betaproteobacteria;o__A21b;f__EB1003;g__;s__	2.25806	4.89286	0.0443586
k__Bacteria;p__Verrucomicrobia;c__Opitutae;o__Opitutales;f__Opitutaceae;g__Opitutus;s__	2.58065	4.03571	0.0444038
k__Bacteria;p__Acidobacteria;c__iii1-8;o__DS-18;f__;g__;s__	5	7.57143	0.0455256
k__Bacteria;p__Planctomycetes;c__;o__;f__;g__;s__	0.483871	1.42857	0.0494366

## Sheet: (b) multivariate tests Plant
==> mrpp_Plant/mrpp_results.txt <==
Call:
mrpp(dat = as.dist(qiime.data$distmat), grouping = qiime.data$map[[opts$category]], permutations = opts$num_permutations)
Dissimilarity index:
Weights for groups: n
Class means and counts:
Gr Sw
delta 0.351 0.4457
n 28 31
Chance corrected within-group agreement A: 0.05881
Based on observed delta 0.4008 and expected delta 0.4258
Significance of delta: 0.001
Permutation: free
Number of permutations: 999
==> adonis_Plant/adonis_results.txt <==
Call:
adonis(formula = as.dist(qiime.data$distmat) ~ qiime.data$map[[opts$category]], permutations = opts$num_permutations)
Permutation: free
Number of permutations: 999
Terms added sequentially (first to last)
Df SumsOfSqs MeanSqs F.Model R2 Pr(>F)
qiime.data$map[[opts$category]] 1 0.7102 0.71024 8.3978 0.12841 0.001 ***
Residuals 57 4.8207 0.08457 0.87159
Total 58 5.5310 1.00000
---
Signif. codes: 0 ‘***’ 0.001 ‘**’ 0.01 ‘*’ 0.05 ‘.’ 0.1 ‘ ’ 1
==> anosim_Plant/anosim_results.txt <==
method name	ANOSIM
test statistic name	R
sample size	59
number of groups	2
test statistic	0.260244
p-value	0.001
number of permutations	999

## Sheet: (c) multivariate tests Dataset
==> mrpp_Dataset/mrpp_results.txt <==
Call:
mrpp(dat = as.dist(qiime.data$distmat), grouping = qiime.data$map[[opts$category]], permutations = opts$num_permutations)
Dissimilarity index:
Weights for groups: n
Class means and counts:
Jesus Rodrigues
delta 0.3472 0.3883
n 41 18
Chance corrected within-group agreement A: 0.1553
Based on observed delta 0.3597 and expected delta 0.4258
Significance of delta: 0.001
Permutation: free
Number of permutations: 999
==> adonis_Dataset/adonis_results.txt <==
Call:
adonis(formula = as.dist(qiime.data$distmat) ~ qiime.data$map[[opts$category]], permutations = opts$num_permutations)
Permutation: free
Number of permutations: 999
Terms added sequentially (first to last)
Df SumsOfSqs MeanSqs F.Model R2 Pr(>F)
qiime.data$map[[opts$category]] 1 1.7116 1.71160 25.544 0.30946 0.001 ***
Residuals 57 3.8194 0.06701 0.69054
Total 58 5.5310 1.00000
---
Signif. codes: 0 ‘***’ 0.001 ‘**’ 0.01 ‘*’ 0.05 ‘.’ 0.1 ‘ ’ 1
==> anosim_Dataset/anosim_results.txt <==
method name	ANOSIM
test statistic name	R
sample size	59
number of groups	2
test statistic	0.961887
p-value	0.001
number of permutations	999
